# Supplementary material for: Fabrication and characterization of a flexible and disposable impedance-type humidity sensor based on polyaniline (PAni)
Source: Royal Society of Chemistry journal article supplement (doi:10.1039/d3ra00009e), 2023-01-01
Supplement: d3ra00009e1.pdf [file d3ra00009e1.pdf]

## Supporting Materials

### S1. Effect of temperature on the impedance responses of humidity sensor.

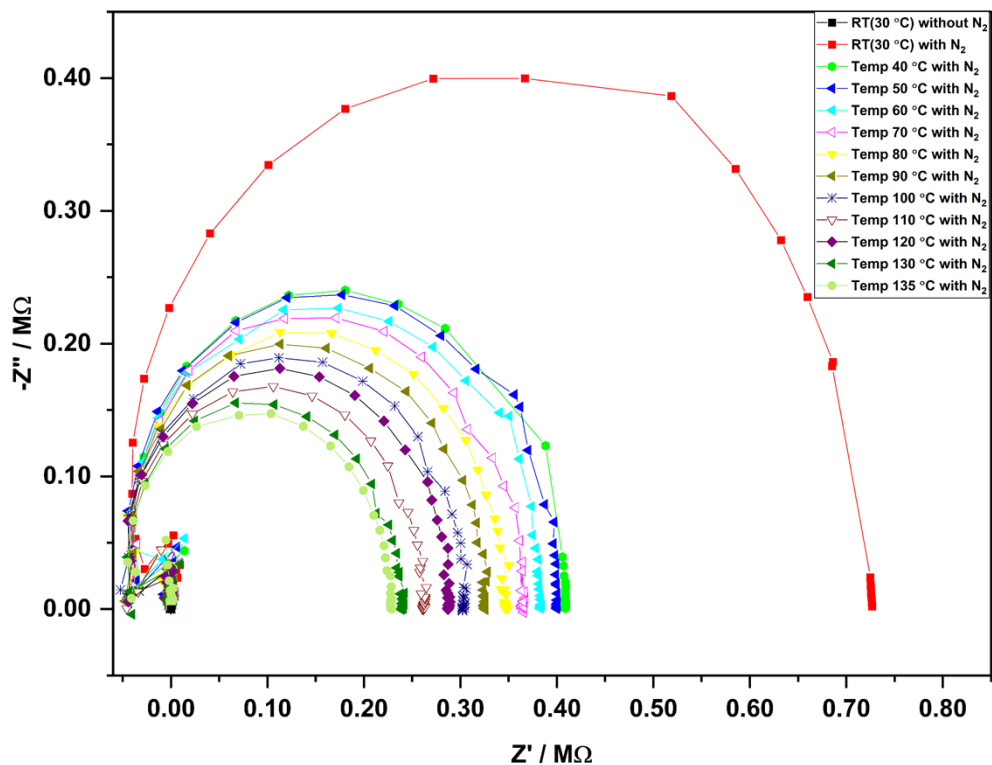

Figure S1: Impedance spectra (negative imaginary impedance vs real impedance) of the sensor at different temperatures in the presence and absence of N<sub>2</sub> gas.

The first impedance spectrum was collected at room temperature (30 °C) without flowing N<sub>2</sub> gas. It can not be clearly seen in figure S1 as it has relatively low impedance values (100 – 200 Ω) compared to other spectra that contain impedance values in MΩ level. Figure S2 shows the impedance spectrum at room temperature without N<sub>2</sub> gas. The other spectra were collected in the presence of N<sub>2</sub> gas starting from room temperature and continuing up to 135 °C.

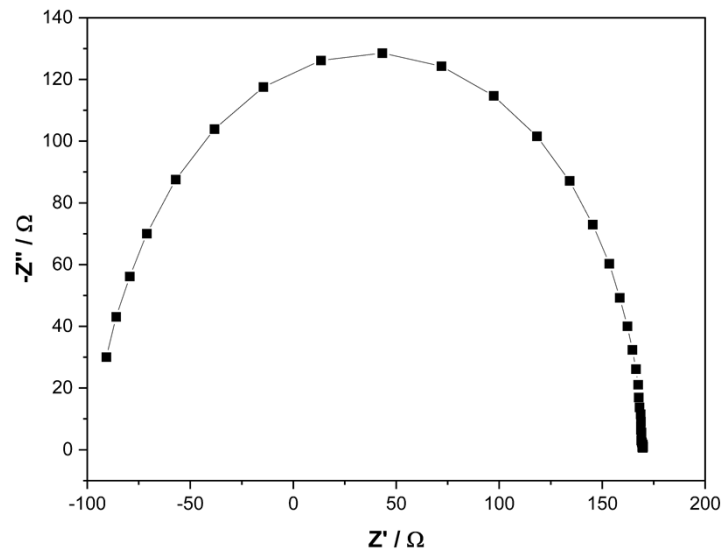

Figure S2: Impedance spectra (negative imaginary impedance vs real impedance) of the sensor at room temperature without  $N_2$  gas.

## S2. Effect of sensor substrate on sensor performance.

As a part of this study, another sensor was developed by replacing sensor substrate with transparent PET film, following the same procedures, dimensions and conditions as described in the paper-based sensor. Electrochemical impedance spectra were collected at different RH levels and analysed to identify the substrate effect. Impedance responses of this sensor were compared with the paper-based sensor to determine the effect of the sensor substrate on the sensing mechanism. With increasing humidity, the impedance of the transparent sheet-based sensor decreases. But, the impedance of the sensor is very high compared to the paper-based sensor at every humidity level. Therefore, the transparent sheet-based sensor had high resistance and low conductivity compared to the paper-based sensor even under the same humidity conditions. In accordance with these observations, it could be suggested that in the PANi film of the paper-based sensor, the mobility of the charge carriers along individual polymer chains and within adjacent chains is comparatively high. Moreover, in transparent sheet-based sensor, the linearity ( $R^2$  values) of impedance Vs RH% plots are comparatively low indicating that impedance change with humidity is not uniform.

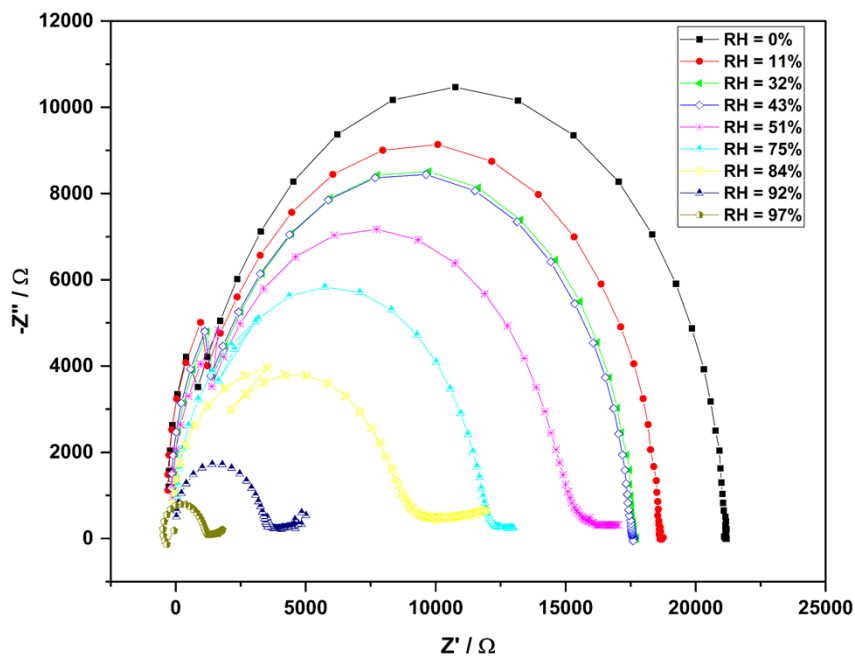

Figure S3: Impedance spectra (negative imaginary impedance vs real impedance) of the humidity sensor developed on the transparent PET sheet substrate at different humidity levels.

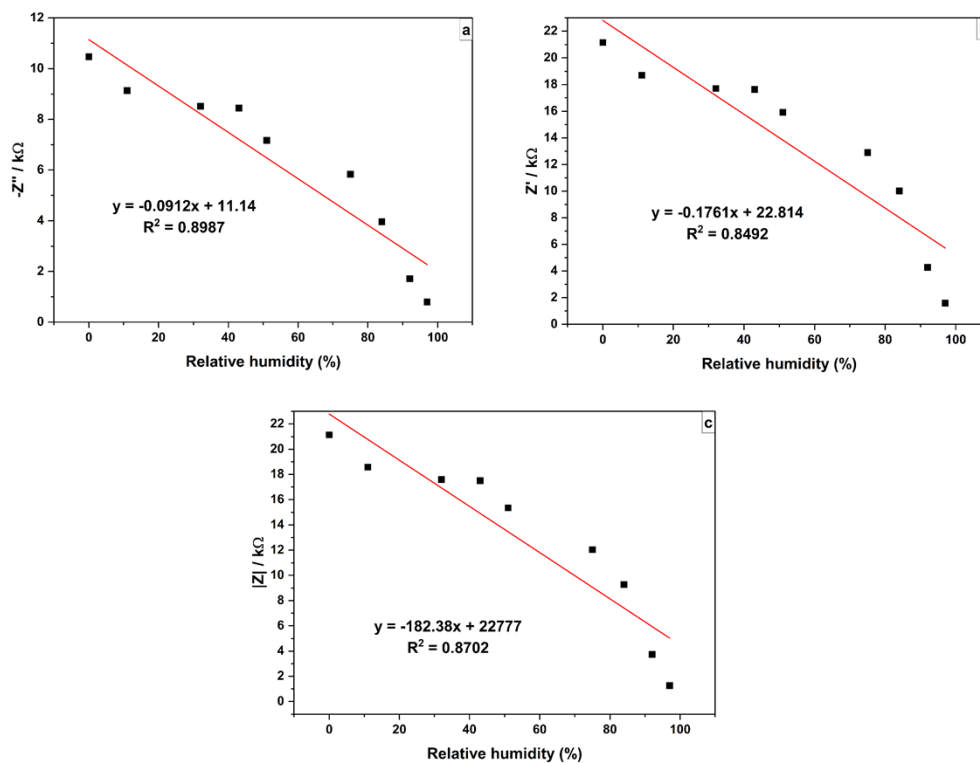

Figure S4: Variation of (a) highest  $-Z''$  values, (b)  $Z'$  values at the intersection with the x-axis, (c)  $|Z|$  at 1000 Hz frequency of humidity sensor developed on the transparent PET sheet substrate.

### S3. Hysteresis of the sensor.

Table S1: Impedance values at 1000 Hz at different humidity levels for the humidification process.

| Relative humidity (%) | Impedance at 1000 Hz ( $\Omega$ ) |
|-----------------------|-----------------------------------|
| 0                     | 251.41                            |
| 11                    | 239.5                             |
| 32                    | 216.32                            |
| 43                    | 202.13                            |
| 51                    | 187.98                            |
| 75                    | 167.75                            |
| 84                    | 159.23                            |
| 92                    | 147.48                            |
| 97                    | 130.52                            |

Table S2: Impedance values at 1000 Hz at different humidity levels for the desiccation process.

| Relative humidity (%) | Impedance at 1000 Hz ( $\Omega$ ) |
|-----------------------|-----------------------------------|
| 0                     | 251.41                            |
| 11                    | 238.65                            |
| 32                    | 214.25                            |
| 43                    | 199.85                            |
| 51                    | 184.7                             |
| 75                    | 164.22                            |
| 84                    | 156.32                            |
| 92                    | 145.71                            |
| 97                    | 130.52                            |

#### S4. Stability of the sensor.

Table S3: Impedance values at 1000 Hz at 11%, 75% and 97% RH levels over 30 days.

| Day | Impedance at 1000 Hz ( $\Omega$ ) |           |           |
|-----|-----------------------------------|-----------|-----------|
|     | RH = 11 %                         | RH = 75 % | RH = 97 % |
| 1   | 239.5                             | 167.75    | 130.52    |
| 5   | 239.56                            | 166.82    | 131.02    |
| 10  | 238.28                            | 167.71    | 130.52    |
| 15  | 238.38                            | 166.8     | 129.52    |
| 20  | 240.38                            | 168.45    | 131.41    |
| 25  | 240.66                            | 163.99    | 128.65    |
| 30  | 240.74                            | 164.74    | 133.27    |

**S5. Repeatability of the sensor between 11% and 75% RH levels.**

Table S4: Impedance values at 1000 Hz with time for the sensor switching between 11% and 75% RH levels.

|    | Time (s) | Impedance at 1000 Hz ( $\Omega$ ) |    | Time (s) | Impedance at 1000 Hz ( $\Omega$ ) |    | Time (s) | Impedance at 1000 Hz ( $\Omega$ ) |
|----|----------|-----------------------------------|----|----------|-----------------------------------|----|----------|-----------------------------------|
| 1  | 50       | 237.25                            | 26 | 1300     | 167.74                            | 51 | 2550     | 166.87                            |
| 2  | 100      | 237.84                            | 27 | 1350     | 204.53                            | 52 | 2600     | 166.58                            |
| 3  | 150      | 238.16                            | 28 | 1400     | 228.13                            | 53 | 2650     | 166.58                            |
| 4  | 200      | 238.24                            | 29 | 1450     | 235.67                            | 54 | 2700     | 166.47                            |
| 5  | 250      | 200.54                            | 30 | 1500     | 239.26                            | 55 | 2750     | 205.14                            |
| 6  | 300      | 185.36                            | 31 | 1550     | 240.12                            | 56 | 2800     | 229.84                            |
| 7  | 350      | 177.84                            | 32 | 1600     | 240.15                            | 57 | 2850     | 235.47                            |
| 8  | 400      | 171.95                            | 33 | 1650     | 208.64                            | 58 | 2900     | 238.86                            |
| 9  | 450      | 168.54                            | 34 | 1700     | 192.54                            | 59 | 2950     | 239.8                             |
| 10 | 500      | 167.7                             | 35 | 1750     | 180.17                            | 60 | 3000     | 239.85                            |
| 11 | 550      | 167.74                            | 36 | 1800     | 170.45                            | 61 | 3050     | 204.35                            |
| 12 | 600      | 167.84                            | 37 | 1850     | 167.75                            | 62 | 3100     | 188.9                             |
| 13 | 650      | 201.75                            | 38 | 1900     | 167.51                            | 63 | 3150     | 179.21                            |
| 14 | 700      | 228.03                            | 39 | 1950     | 167.4                             | 64 | 3200     | 171.98                            |
| 15 | 750      | 235.26                            | 40 | 2000     | 167.39                            | 65 | 3250     | 167.96                            |
| 16 | 800      | 238.67                            | 41 | 2050     | 210.14                            | 66 | 3300     | 167.86                            |
| 17 | 850      | 239.01                            | 42 | 2100     | 229.01                            | 67 | 3350     | 167.78                            |
| 18 | 900      | 239.15                            | 43 | 2150     | 234.74                            | 68 | 3400     | 167.71                            |
| 19 | 950      | 202.87                            | 44 | 2200     | 238.35                            | 69 | 3450     | 205.69                            |
| 20 | 1000     | 188.2                             | 45 | 2250     | 238.87                            | 70 | 3500     | 229.00                            |
| 21 | 1050     | 178.26                            | 46 | 2300     | 238.9                             | 71 | 3550     | 234.67                            |
| 22 | 1100     | 172.19                            | 47 | 2350     | 206.24                            | 72 | 3600     | 237.54                            |
| 23 | 1150     | 168.34                            | 48 | 2400     | 191.07                            | 73 | 3650     | 238.48                            |
| 24 | 1200     | 167.42                            | 49 | 2450     | 179.86                            | 74 | 3700     | 238.52                            |
| 25 | 1250     | 167.74                            | 50 | 2500     | 171.98                            |    |          |                                   |

## S6. Response reversibility of the sensor

Table S5: Impedance values at 1000 Hz with time for switching the sensor back and forth between RH 0% and continuously increasing RH levels for the 11-97% range.

|    | Time (s) | Impedance at 1000 Hz ( $\Omega$ ) |    | Time (s) | Impedance at 1000 Hz ( $\Omega$ ) |    | Time (s) | Impedance at 1000 Hz ( $\Omega$ ) |     | Time (s) | Impedance at 1000 Hz ( $\Omega$ ) |
|----|----------|-----------------------------------|----|----------|-----------------------------------|----|----------|-----------------------------------|-----|----------|-----------------------------------|
| 1  | 50       | 250.74                            | 30 | 1500     | 251.45                            | 59 | 2950     | 212.36                            | 88  | 4400     | 178.05                            |
| 2  | 100      | 251.56                            | 31 | 1550     | 226.97                            | 60 | 3000     | 186.84                            | 89  | 4450     | 164.59                            |
| 3  | 150      | 251.6                             | 32 | 1600     | 213.97                            | 61 | 3050     | 178.54                            | 90  | 4500     | 156.9                             |
| 4  | 200      | 251.64                            | 33 | 1650     | 207.91                            | 62 | 3100     | 173.21                            | 91  | 4550     | 150.03                            |
| 5  | 250      | 246.32                            | 34 | 1700     | 203.26                            | 63 | 3150     | 169.14                            | 92  | 4600     | 148.36                            |
| 6  | 300      | 242.56                            | 35 | 1750     | 202.75                            | 64 | 3200     | 168.25                            | 93  | 4650     | 147.83                            |
| 7  | 350      | 239.95                            | 36 | 1800     | 202.38                            | 65 | 3250     | 168.43                            | 94  | 4700     | 147.75                            |
| 8  | 400      | 239.64                            | 37 | 1850     | 202.25                            | 66 | 3300     | 168.26                            | 95  | 4750     | 203.45                            |
| 9  | 450      | 239.72                            | 38 | 1900     | 202.23                            | 67 | 3350     | 210.45                            | 96  | 4800     | 226.04                            |
| 10 | 500      | 239.64                            | 39 | 1950     | 228.62                            | 68 | 3400     | 240.35                            | 97  | 4850     | 241.57                            |
| 11 | 550      | 239.58                            | 40 | 2000     | 246.13                            | 69 | 3450     | 247.94                            | 98  | 4900     | 249.14                            |
| 12 | 600      | 248.47                            | 41 | 2050     | 251.34                            | 70 | 3500     | 250.26                            | 99  | 4950     | 250.08                            |
| 13 | 650      | 251.26                            | 42 | 2100     | 251.25                            | 71 | 3550     | 250.89                            | 100 | 5000     | 250.12                            |
| 14 | 700      | 251.43                            | 43 | 2150     | 251.4                             | 72 | 3600     | 250.97                            | 101 | 5050     | 190.21                            |
| 15 | 750      | 251.56                            | 44 | 2200     | 251.58                            | 73 | 3650     | 212.57                            | 102 | 5100     | 165.37                            |
| 16 | 800      | 251.66                            | 45 | 2250     | 224.12                            | 74 | 3700     | 184.51                            | 103 | 5150     | 153.87                            |
| 17 | 850      | 235.64                            | 46 | 2300     | 203.47                            | 75 | 3750     | 172.87                            | 104 | 5200     | 145.53                            |
| 18 | 900      | 225.31                            | 47 | 2350     | 195.98                            | 76 | 3800     | 165.36                            | 105 | 5250     | 137.64                            |
| 19 | 950      | 219.24                            | 48 | 2400     | 189.96                            | 77 | 3850     | 159.87                            | 106 | 5300     | 132.54                            |
| 20 | 1000     | 216.98                            | 49 | 2450     | 188.36                            | 78 | 3900     | 158.96                            | 107 | 5350     | 131.52                            |
| 21 | 1050     | 216.34                            | 50 | 2500     | 188.64                            | 79 | 3950     | 158.82                            | 108 | 5400     | 131.47                            |
| 22 | 1100     | 216.3                             | 51 | 2550     | 188.12                            | 80 | 4000     | 158.89                            | 109 | 5450     | 185.36                            |
| 23 | 1150     | 216.26                            | 52 | 2600     | 188.25                            | 81 | 4050     | 220.53                            | 110 | 5500     | 221.98                            |
| 24 | 1200     | 216.38                            | 53 | 2650     | 220.46                            | 82 | 4100     | 238.01                            | 111 | 5550     | 238.64                            |
| 25 | 1250     | 231.98                            | 54 | 2700     | 244.87                            | 83 | 4150     | 246.68                            | 112 | 5600     | 246.29                            |
| 26 | 1300     | 246.56                            | 55 | 2750     | 252.02                            | 84 | 4200     | 250.42                            | 113 | 5650     | 249.1                             |
| 27 | 1350     | 251.28                            | 56 | 2800     | 252.16                            | 85 | 4250     | 251.16                            | 114 | 5700     | 249.73                            |
| 28 | 1400     | 251.36                            | 57 | 2850     | 251.84                            | 86 | 4300     | 251.23                            |     |          |                                   |
| 29 | 1450     | 251.14                            | 58 | 2900     | 252.21                            | 87 | 4350     | 200.54                            |     |          |                                   |

**S7. SEM analysis of the PANi film.**

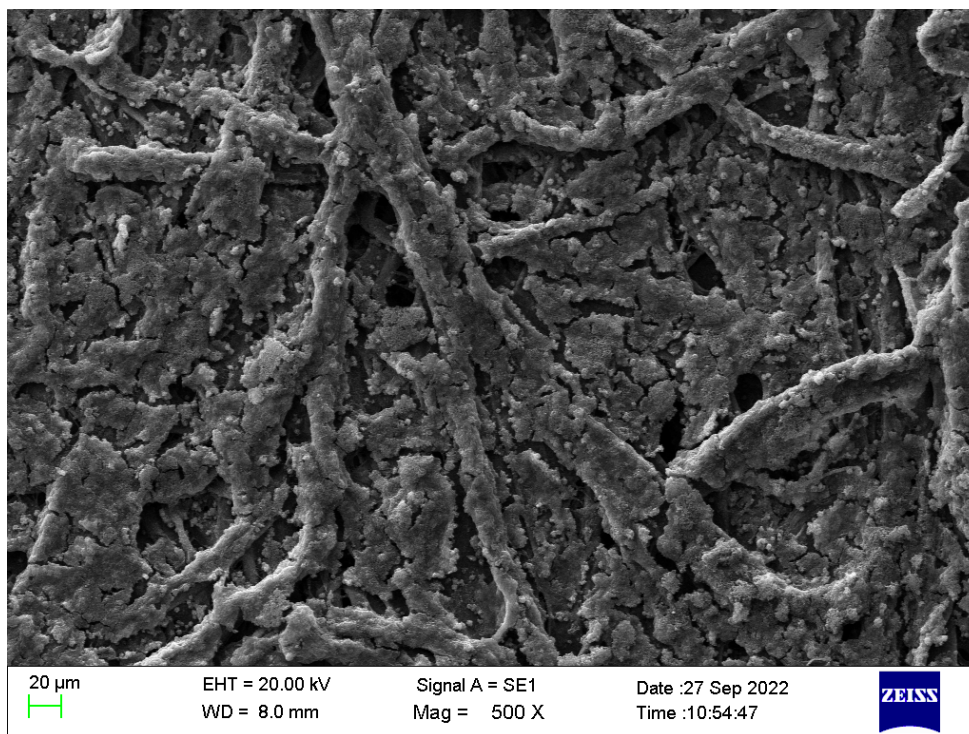

Figure S5: SEM images of the PANi film with low magnification (500 X).

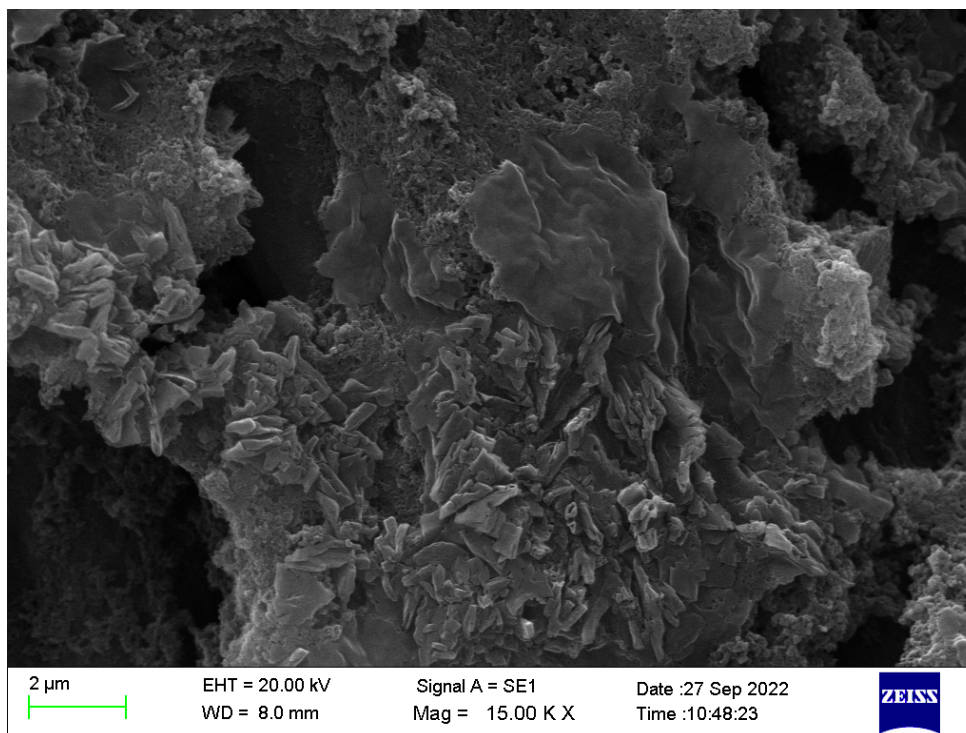

Figure S6: SEM images of the PANi film with high magnification (15.00 KX).



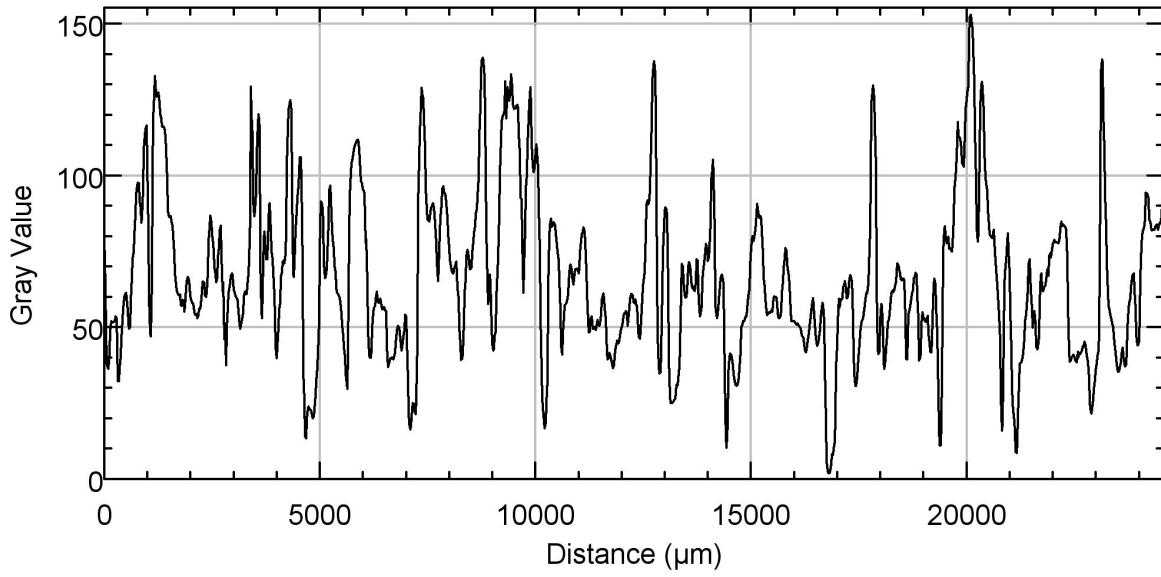

Figure S7: Surface roughness profile.

Figure S7 shows the surface roughness profile generated along with ImageJ software (Roughness calculation plugin).

### **S8. Response percentage/ Responsivity calculation.**

The response percentage of the sensor was calculated as follows.

$$\% \text{Response} = ((R_i - R_f) / R_i) \times 100$$

Here,  $R_i$  and  $R_f$  are the resistance/impedance of the sensor under initial/dry state and moist state, respectively.
